# Supplementary material for: Fast and Environment-Friendly GC-MS Method for Eleven Organophosphorus Flame Retardants in Indoor Air, Dust, and Skin Wipes
Source: MDPI journal article supplement (doi:10.3390/toxics9120350), 2021-12-11
Supplement: s1 [file s1]

# Supplementary Materials: Fast and Environment-Friendly GC-MS Method for Eleven Organophosphorus Flame Retardants in Indoor Air, Dust, and Skin Wipes

Chung-Yu Chen, Yu-Hsuan Liu, Chia-Hui Chieh and Wei-Hsiang Chang

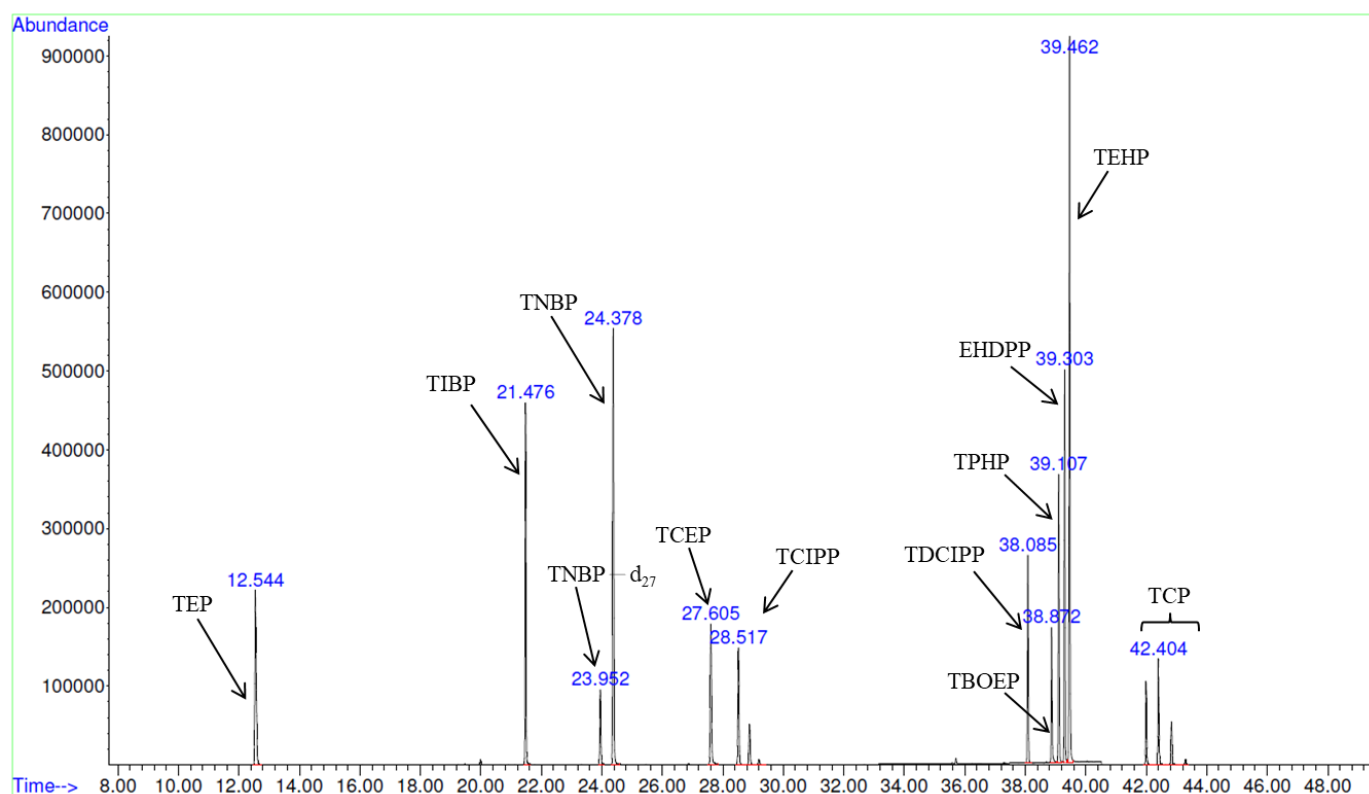

**Figure S1.** Selected Ion Monitor chromatogram of a standard solution of eleven OPFRs (5 µg/mL).

(A)

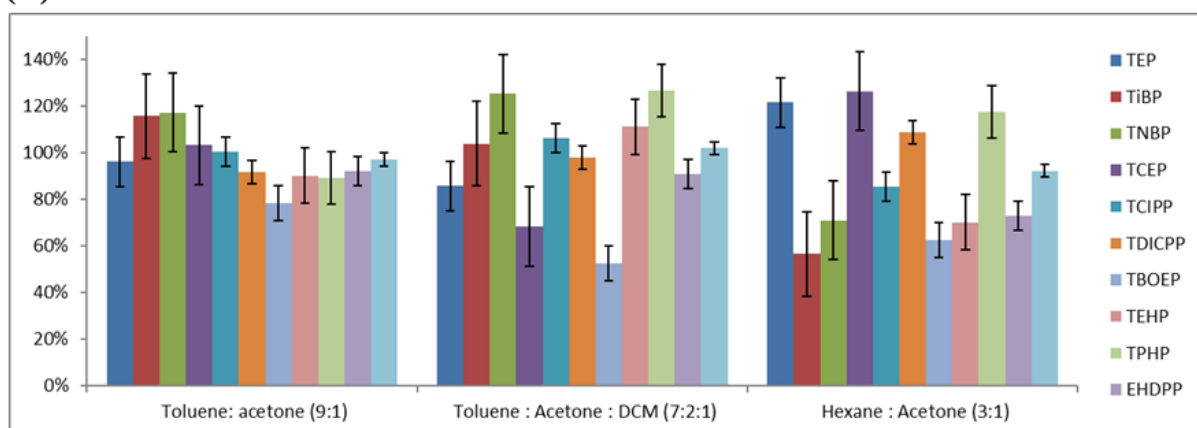

(B)

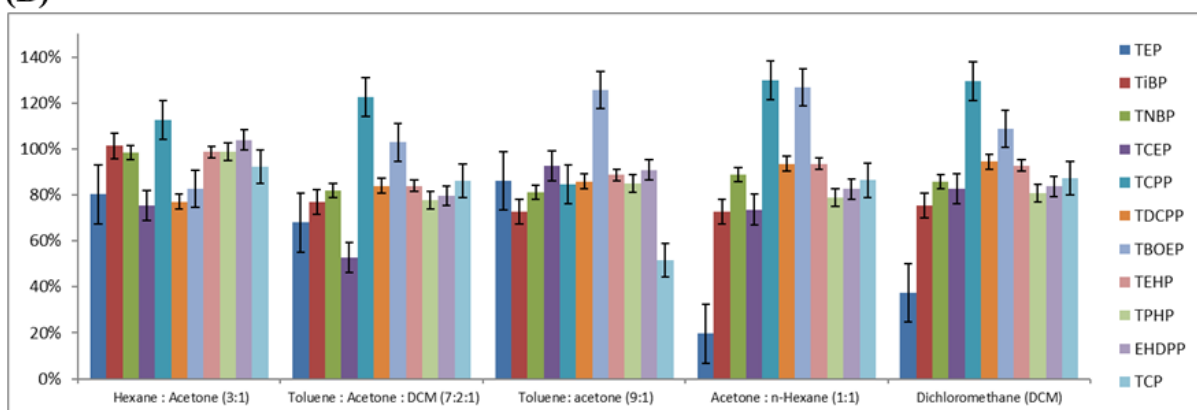

(C)

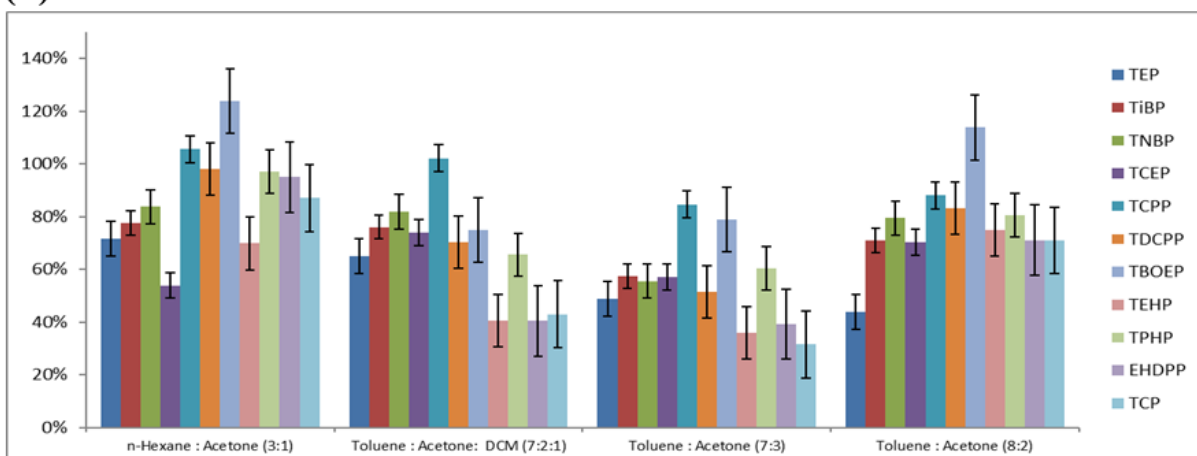

**Figure S2.** Spike (5.0 µg/ml) recovery rate of different matrix in different solvents and proportion (A) Indoor air samples, (B) House dust samples and (C) Dermal wipe samples.

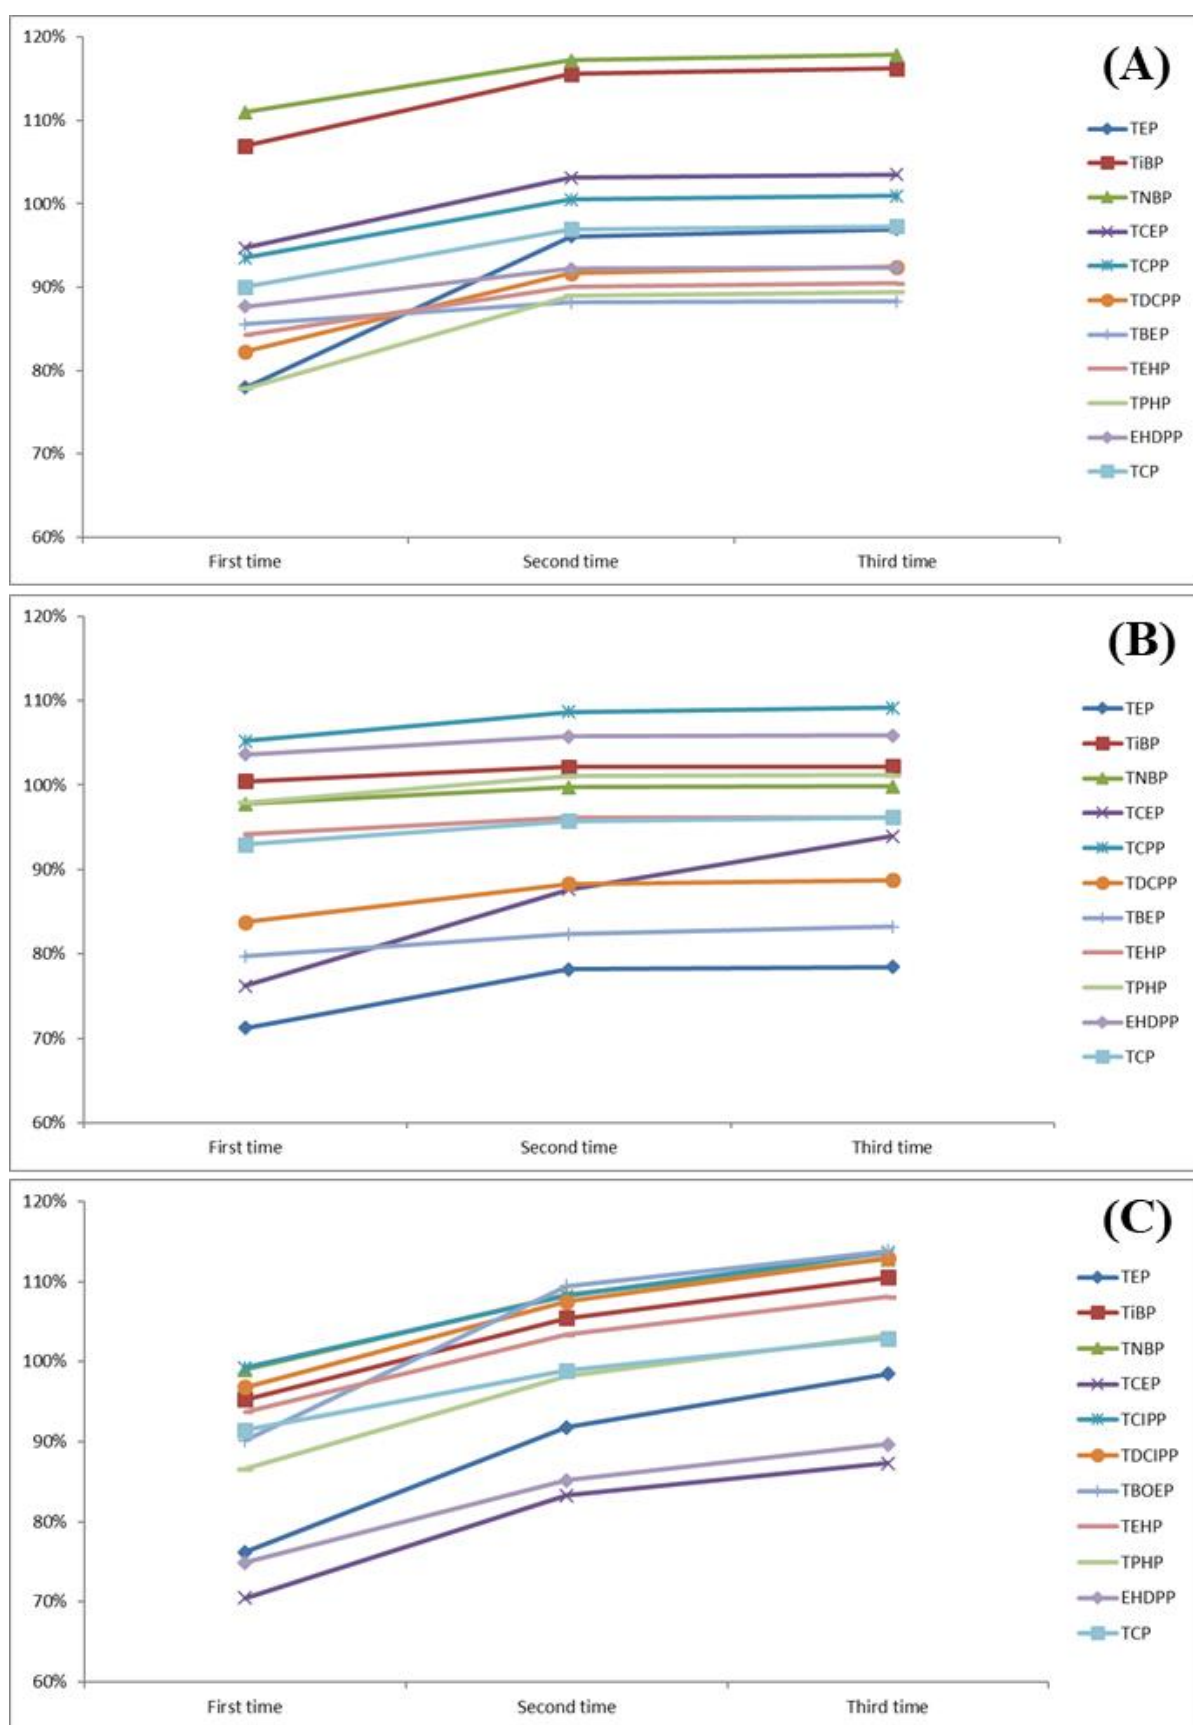

**Figure S3.** The spike (5.0 µg/ml) recovery rate of different matrix in different extraction times (A) Indoor air samples, (B) House dust samples and (C) Dermal wipe samples..

**Table S1.** Summary of the names, practical abbreviations(Abbr.), CAS Number, molecular structures, molecular formulas, molecular weight, Solubility, Vapor pressure, log K<sub>oa</sub>, log K<sub>ow</sub> and Bioconcentration Factor(BCFs) of the analyzed OPFRs

| Chemical species       | Compound                             | Abbr.  | CAS no.    | Molecular structure                                                                   | Molecular Formula                                               | Molecular weight | Solubility (mg/L, 25°C) | Vapor pressure (mmHg, 25°C) |
|------------------------|--------------------------------------|--------|------------|---------------------------------------------------------------------------------------|-----------------------------------------------------------------|------------------|-------------------------|-----------------------------|
| Non-Cl alkyl phosphate | Triethyl phosphate                   | TEP    | 78-40-0    | 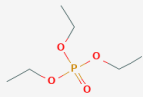   | C <sub>6</sub> H <sub>15</sub> O <sub>4</sub> P                 | 182.15           | 11.5                    | 3.93 × 10 <sup>-1</sup>     |
|                        | Tributyl phosphate                   | TNBP   | 126-73-8   |    | C <sub>12</sub> H <sub>27</sub> O <sub>4</sub> P                | 266.31           | 280                     | 1.13 × 10 <sup>-3</sup>     |
|                        | Tri-iso-butyl phosphate              | TiBP   | 126-71-6   |    | C <sub>12</sub> H <sub>27</sub> O <sub>4</sub> P                | 266.31           | 475.6                   | 1.29 × 10 <sup>-2</sup>     |
|                        | Tris(2-ethylhexyl) phosphate         | TEHP   | 78-42-2    |    | C <sub>24</sub> H <sub>51</sub> O <sub>4</sub> P                | 434.63           | 0.6                     | 8.25 × 10 <sup>-8</sup>     |
| Aryl phosphate         | Triphenyl phosphate                  | TPHP   | 115-86-6   |    | C <sub>18</sub> H <sub>15</sub> O <sub>4</sub> P                | 326.28           | 1.9                     | 1.12 × 10 <sup>-5</sup>     |
|                        | Tricresyl phosphate                  | TCP    | 1330-78-5  |   | C <sub>21</sub> H <sub>21</sub> O <sub>4</sub> P                | 368.37           | 0.36                    | 1.8 × 10 <sup>-7</sup>      |
| Cl alkyl phosphate     | Tris(2-chloroethyl) phosphate        | TCEP   | 115-96-8   |  | C <sub>6</sub> H <sub>12</sub> Cl <sub>3</sub> O <sub>4</sub> P | 285.48           | 7000                    | 6.13 × 10 <sup>-2</sup>     |
|                        | Tris(chloroisopropyl) phosphate      | TCIPP  | 13674-84-5 |  | C <sub>9</sub> H <sub>18</sub> Cl <sub>3</sub> O <sub>4</sub> P | 327.56           | 51.9                    | 5.64 × 10 <sup>-5</sup>     |
|                        | Tris(1,3-dichloro-2-propyl)phosphate | TDCIPP | 13674-87-8 |  | C <sub>9</sub> H <sub>15</sub> Cl <sub>6</sub> O <sub>4</sub> P | 430.89           | 7                       | 2.98 × 10 <sup>-7</sup>     |

|                 |                                |       |             |                                                                                     |                    |        |      |                       |
|-----------------|--------------------------------|-------|-------------|-------------------------------------------------------------------------------------|--------------------|--------|------|-----------------------|
| Other phosphate | Tris(2-butoxyethyl) phosphate  | TBOEP | 78-51-3     | 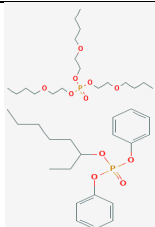 | $C_{18}H_{39}O_7P$ | 398.47 | 1100 | $1.23 \times 10^{-6}$ |
|                 | 2-ethylhexyldiphenyl phosphate | EHDPP | 109925-03-3 |                                                                                     | $C_{20}H_{27}O_4P$ | 362.41 | 1.9  | $5 \times 10^{-5}$    |

Abbr: abbreviation; CAS no: chemical abstract service number; log Kow: octanol-water partition coefficient; log Koa: octanol-air partition coefficient BCF: bioaccumulation factor. The data are compiled from (Q Wang et al. 2017), Hazardous Substances Data Bank (HSDB) of TOXNET, accessed at 16 June, 2020.

**Table S2.** Comparisons of analytical methods and recovery to previous studies.

| Sampling matrix                 | Solvent                                | Extraction         | Clean-up        | Instrumental analysis | Recovery (%)                | Reference     |
|---------------------------------|----------------------------------------|--------------------|-----------------|-----------------------|-----------------------------|---------------|
| Indoor air samples              |                                        |                    |                 |                       |                             |               |
| XAD-2 absorbents                | toluene: acetone<br>(9:1, <i>v/v</i> ) | Ultra-sonication   | -               | GC-MS                 | 94.2–113                    | Present study |
| XAD-2 absorbents                | n-hexane/acetone<br>(3:1, <i>v/v</i> ) | Ultra-sonication   | Florisil column | GC-MS                 | 75–172                      | 1             |
| polyurethane foam               | Dichloromethane<br>(DCM)               | Soxhlet extraction | Silica column   | GC-MS, GC-MS/MS       | 70–120                      | 2             |
| House dust samples              |                                        |                    |                 |                       |                             |               |
| Socks<br>(ASHRAE#1 test dust)   | n-hexane/acetone<br>(3:1, <i>v/v</i> ) | Ultra-sonication   | -               | GC-MS                 | 77.1–109                    | Present study |
| Indoor dust                     | dichloromethane                        | Ultra-sonication   | Florisil column | GC-MS                 | 21–127                      | 3             |
| Cellulose filters<br>(SRM 2582) | n-hexane/acetone<br>(3:1, <i>v/v</i> ) | Ultra-sonication   | Florisil column | GC-MS                 | 57–150                      | 1             |
| Socks                           | n-hexane/acetone<br>(1:1, <i>v/v</i> ) | Ultra-sonication   | Silica column   | GC-MS/MS              | 70–120                      | 2             |
| Nylon sampling sock             | n-hexane/acetone<br>(3/1, <i>v/v</i> ) | Ultra-sonication   | Florisil column | GC-MS                 | 49–130                      | 4             |
| Forensic filters<br>(SRM2585)   | n-hexane/acetone<br>(3:1, <i>v/v</i> ) | Ultra-sonication   | Florisil column | GC-EI/MS              | 43–111<br>(TBOEP 172 - 268) | 5             |
| Skin wipe samples               |                                        |                    |                 |                       |                             |               |
| Ghost wipe                      | n-hexane/acetone<br>(3:1, <i>v/v</i> ) | Ultra-sonication   | -               | GC-MS                 | 73.4–113                    | Present study |
| Gauze Pads in isopropanol       | n-hexane/acetone (3:1, <i>v/v</i> )    | Ultra-sonication   | Silica column   | GC-MS                 | 70–130%                     | 6             |
| Gauze soaked in isopropanol     | n-hexane/acetone<br>(1:1, <i>v/v</i> ) | Ultra-sonication   | Silica column   | GC-MS                 | 41–134                      | 7             |
| Kleenex tissue                  | n-hexane/acetone<br>(3:1, <i>v/v</i> ) | Ultra-sonication   | Florisil column | GC-MS                 | 74–100                      | 1             |
| Gauze soaked in isopropanol     | n-hexane/acetone<br>(3/1, <i>v/v</i> ) | Ultra-sonication   | Florisil column | GC-MS                 | 49–130                      | 4             |

**Table S3.** Measured and reference concentrations ( $\mu\text{g/g}$ ) of selected OPFRs in dust SRM.

|       | Present study ( $n = 5$ ) |      | Certified values <sup>a</sup> |     | Percent error (%) |
|-------|---------------------------|------|-------------------------------|-----|-------------------|
|       | Mean                      | SD   | Mean                          | SD  |                   |
| TNBP  | 196                       | 2.19 | 276                           | 14  | -28.9             |
| TCEP  | 993                       | 5.47 | 925                           | 149 | 7.16              |
| TCIPP | 1366                      | 110  | 1220                          | 350 | 11.0              |
| TPHP  | 1103                      | 52.5 | 1190                          | 130 | -7.62             |

<sup>a</sup>According to Gałuszka et al. (2012). “-”, no use for the material

## References

- Persson, J.; Wang, T.; Hagberg, J. Organophosphate flame retardants and plasticizers in indoor dust, air and window wipes in newly built low-energy preschools. *Sci. Total Environ.* **2018**, *628–629*, 159–168, doi:10.1016/j.scitotenv.2018.02.053.
- Vykoukalova, M.; Venier, M.; Vojta, S.; Melymuk, L.; Becanova, J.; Romanak, K.; Prokes, R.; Okeme, J.O.; Saini, A.; Diamond, M.L.; et al. Organophosphate esters flame retardants in the indoor environment. *Environ. Int.* **2017**, *106*, 97–104, doi:10.1016/j.envint.2017.05.020.
- Van den Eede, N.; Dirtu, A.C.; Neels, H.; Covaci, A. Analytical developments and preliminary assessment of human exposure to organophosphate flame retardants from indoor dust. *Environ. Int.* **2011**, *37*, 454–461, doi:10.1016/j.envint.2010.11.010.
- Liu, X.; Yu, G.; Cao, Z.; Wang, B.; Huang, J.; Deng, S.; Wang, Y. Occurrence of organophosphorus flame retardants on skin wipes: Insight into human exposure from dermal absorption. *Environ. Int.* **2017**, *98*, 113–119, doi:10.1016/j.envint.2016.10.021.
- Cequier, E.; Ionas, A.C.; Covaci, A.; Marce, R.M.; Becher, G.; Thomsen, C. Occurrence of a broad range of legacy and emerging flame retardants in indoor environments in Norway. *Environ. Sci. Technol.* **2014**, *48*, 6827–6835, doi:10.1021/es500516u.
- Xu, F.; Giovanoulis, G.; van Waes, S.; Padilla-Sanchez, J.A.; Papadopoulou, E.; Magner, J.; Haug, L.S.; Neels, H.; Covaci, A. Comprehensive study of human external exposure to organophosphate flame retardants via air, dust, and hand wipes: The Importance of sampling and assessment strategy. *Environ. Sci. Technol.* **2016**, *50*, 7752–7760, doi:10.1021/acs.est.6b00246.
- Larsson, K.; de Wit, C.A.; Sellstrom, U.; Sahlstrom, L.; Lindh, C.H.; Berglund, M. Brominated flame retardants and organophosphate esters in preschool dust and children’s hand wipes. *Environ. Sci. Technol.* **2018**, *52*, 4878–4888, doi:10.1021/acs.est.8b00184.
